# Supplementary material
Source: Springer Nature journal article supplement (https://www.springermedizin.de/resource/supplementary/12943_2007_328_MOESM7_ESM.pdf/9553936)

a)

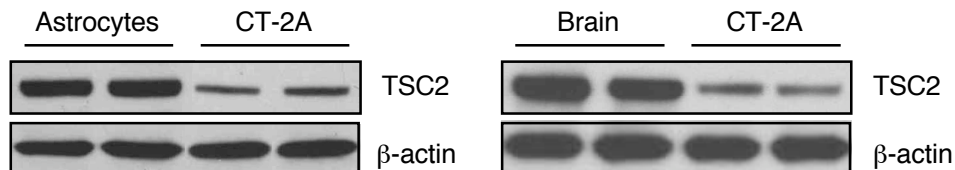

b)

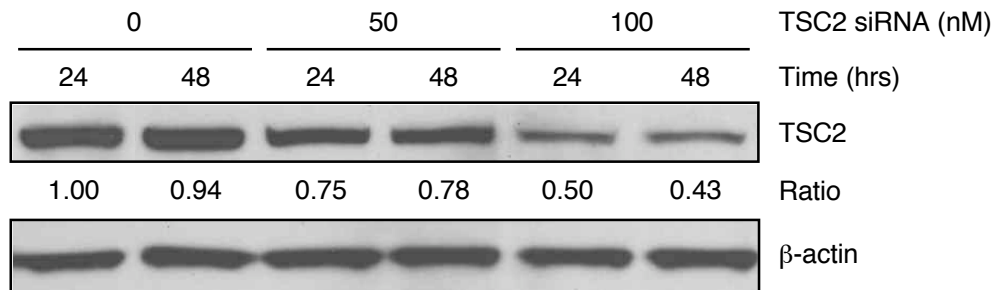

c)

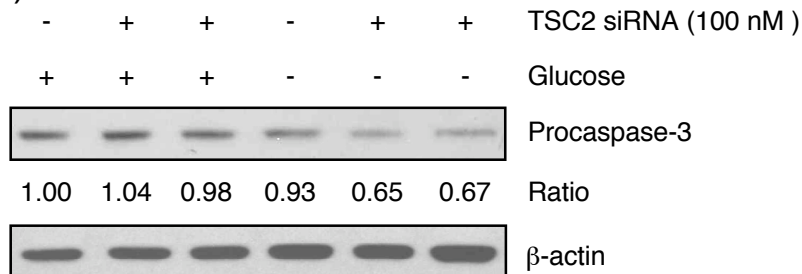

Supplement: MOESM7 [file 9553936]
